# Supplementary material for: Investigation of the α-pinene photooxidation by OH in the atmospheric simulation chamber SAPHIR
Source: Copernicus journal article supplement (doi:10.5194/acp-2019-492), 2019-06-04
Supplement: Supplementary file 1 [file acp-2019-492-supplement.pdf]

# Investigation of the $\alpha$ -pinene photooxidation by OH in the atmospheric simulation chamber SAPHIR

Michael Rolletter<sup>1</sup>, Martin Kaminski<sup>1,a</sup>, Ismail-Hakki Acir<sup>1,b</sup>, Birger Bohn<sup>1</sup>, Hans-Peter Dorn<sup>1</sup>, Xin Li<sup>1,c</sup>, Anna Lutz<sup>2</sup>, Sascha Nehr<sup>1,d</sup>, Franz Rohrer<sup>1</sup>, Ralf Tillmann<sup>1</sup>, Robert Wegener<sup>1</sup>, Andreas Hofzumahaus<sup>1</sup>, Astrid Kiendler-Scharr<sup>1</sup>, Andreas Wahner<sup>1</sup>, and Hendrik Fuchs<sup>1</sup>

<sup>1</sup>Institute of Energy and Climate Research, IEK-8: Troposphere, Forschungszentrum Jülich GmbH, Jülich, Germany

<sup>2</sup>Department of Chemistry and Molecular Biology, University of Gothenburg, Gothenburg, Sweden

<sup>a</sup>now at: Federal Office of Consumer Protection and Food Safety, Department 5: Method Standardisation, Reference Laboratories, Resistance to Antibiotics, Berlin, Germany

<sup>b</sup>now at: Institute of Nutrition and Food Sciences, Food Chemistry, University of Bonn, Bonn, Germany

<sup>c</sup>now at: State Key Joint Laboratory of Environmental Simulation and Pollution Control, College of Environmental Sciences and Engineering, Peking University, Beijing, China

<sup>d</sup>now at: INBUREX Consulting GmbH, Process Safety, Hamm, Germany

**Correspondence:** Hendrik Fuchs (h.fuchs@fz-juelich.de)

## Supplement

### S1 Calculation of product yields

To calculate the yield as described in Galloway et al. (2011) and Kaminski et al. (2017) it is necessary to correct measured concentrations for losses and additional sources. The correction term for the example of pinonaldehyde is shown in Eq. S1:

$$5 \quad c_{\text{pinal corr}}[i] = c_{\text{pinal}}[i - 1] + \Delta c_{\text{pinal}} + \Delta c_{\text{dil}} + \Delta c_{\text{rl}} + \Delta c_{\text{pl}} - \Delta c_{\text{O}_3} \quad (\text{S1})$$

To obtain the corrected pinonaldehyde concentration  $c_{\text{pinal corr}}$  the measured concentration  $c_{\text{pinal}}$  has to be corrected for losses by photolysis  $\Delta c_{\text{pl}}$ , dilution  $\Delta c_{\text{dil}}$  and the reaction with OH radicals  $\Delta c_{\text{rl}}$ , as well as a source from the ozonolysis of  $\alpha$ -pinene  $\Delta c_{\text{O}_3}$ . The different terms are further explained in the equations S2 to S5:

$$\Delta c_{\text{dil}} = c_{\text{pinal}}[i - 1] * \Delta t * k_{\text{dil}}[i - 1] \quad (\text{S2})$$

$$10 \quad \Delta c_{\text{rl}} = c_{\text{pinal}}[i - 1] * \Delta t * c_{\text{OH}}[i - 1] * k_{\text{pinal} + \text{OH}} \quad (\text{S3})$$

$$\Delta c_{\text{pl}} = c_{\text{pinal}}[i - 1] * \Delta t * J_{\text{pinal}}[i - 1] \quad (\text{S4})$$

$$\Delta c_{\text{O}_3} = c_{\text{pinal}}[i - 1] * \Delta t * c_{\text{O}_3}[i - 1] * k_{\text{apinene} + \text{O}_3} \quad (\text{S5})$$

- $c_{\text{pinal corr}}[i]$  : corrected pinonaldehyde concentration at time  $i$   
 $c_{\text{pinal}}[i - 1]$  : measured pinonaldehyde concentration at time  $i-1$   
 $\Delta c_{\text{dil}}$  : dilution  
 $\Delta c_{\text{r1}}$  : loss due to the reaction with OH  
5  $\Delta c_{\text{pl}}$  : photolytic loss  
 $\Delta c_{\text{O3}}$  : production from ozonolysis  
 $c_{\text{OH}}[i - 1]$  : measured OH concentration by DOAS at time  $i-1$   
 $k_{\text{pinal} + \text{OH}}$  : reaction rate of pinonaldehyde + OH (Atkinson et al., 2006)  
 $J_{\text{pinal}}[i - 1]$  : measured photolysis frequency at time  $i-1$   
10  $c_{\text{O3}}[i - 1]$  :  $\text{O}_3$  concentration at time  $i-1$   
 $k_{\text{apinene} + \text{O3}}$  : reaction rate of  $\alpha$ -pinene +  $\text{O}_3$  (MCM, 2019)

An overview of all corrections made for the different species is shown in Table S1.

| species          | corrected for                                            |                                              |
|------------------|----------------------------------------------------------|----------------------------------------------|
|                  | losses by                                                | sources from                                 |
| $\alpha$ -pinene | $\alpha$ -pinene + $\text{O}_3$<br>dilution              | /                                            |
| pinonaldehyde    | pinonaldehyde + $h\nu$<br>pinonaldehyde + OH<br>dilution | $\alpha$ -pinene + $\text{O}_3$              |
| acetone          | acetone + OH<br>dilution                                 | chamber wall                                 |
| HCHO             | HCHO + OH<br>HCHO + $h\nu$<br>dilution                   | $\text{CH}_3\text{CHO}$ + OH<br>chamber wall |

**Table S1.** Overview of correction terms for the analysed species applied in the yield calculation.

Fig. S1 shows the measured (blue) and corrected concentrations (red). For  $\alpha$ -pinene the amount of reacted substance is accumulated over the whole duration of the experiment and corrected for losses by ozonolysis and dilution. The corrected  
15 HCHO, acetone and pinonaldehyde are then plotted versus the corrected amount of reacted  $\alpha$ -pinene. The yield of the reaction  $\alpha$ -pinene + OH is derived from the resulting slopes.

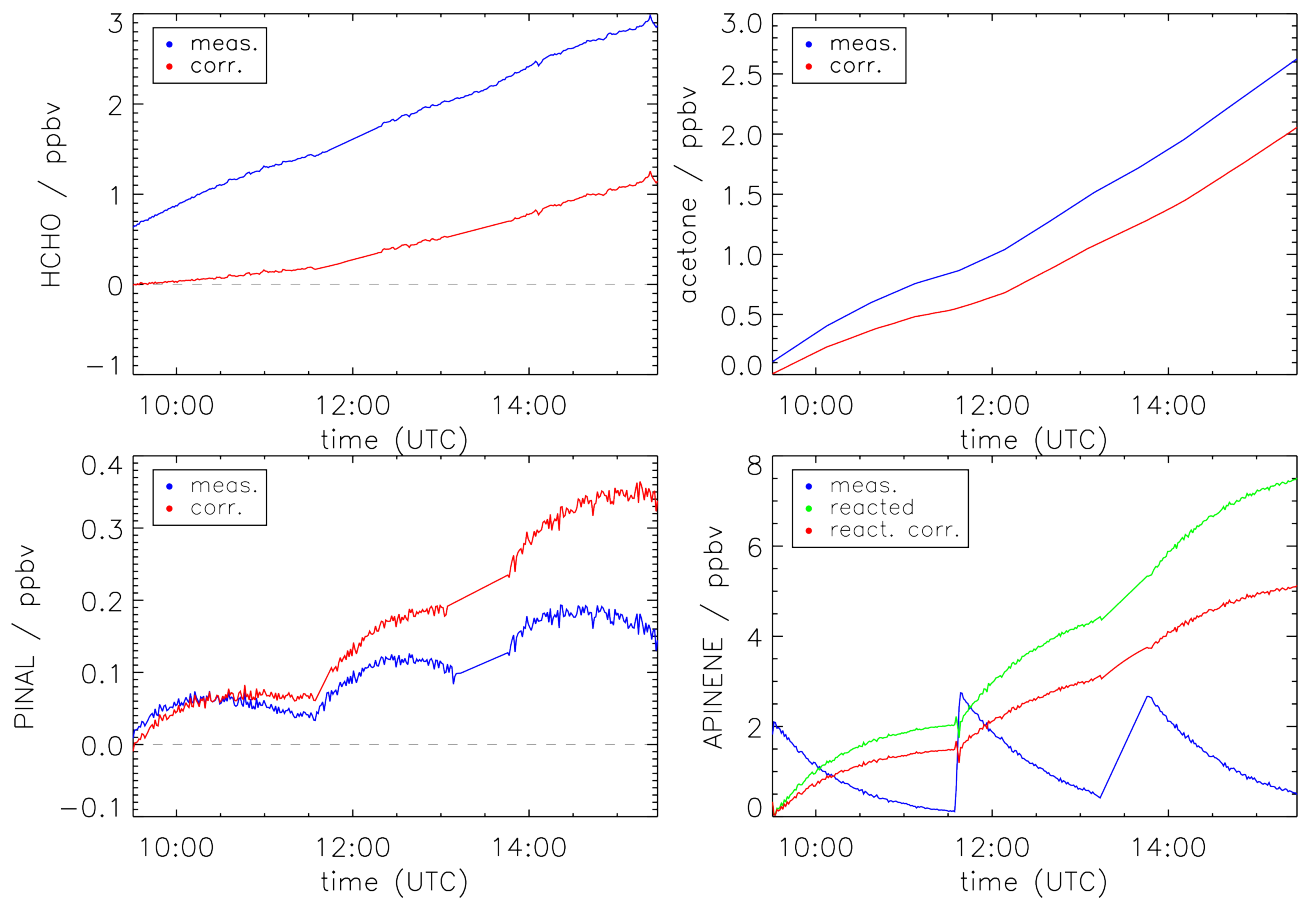

**Figure S1.** The blue curves show the measured concentrations. For  $\alpha$ -pinene the green curve represents the amount of reacted substance. The individual concentrations after the applied correction are shown in red.

## S2 Model modifications for M1 sensitivity study

All additions made in the sensitivity run M1 based on the suggestions by Vereecken et al. (2007) are shown in Tables S2 and S3. The naming schema of reactants starting with an “R” is according to Vereecken et al. (2007). Table S2 shows the initial oxidation step of the OH attack, and the subsequent chemistry of the RO<sub>2</sub> after the OH addition.

- 5 For simplification only one out of three hydrogen-abstraction pathways is included here forming compound ROOA. The subsequent chemistry of ROOA is shown in Table S3.

APINCO<sub>2</sub> was replaced by synR1 and antiR1 as the mechanism by Vereecken et al. (2007) distinguishes the syn and anti stereoisomers of this compound following different pathways. Both synR1 and antiR1 can react with NO but this pathway is outrun by the unimolecular reactions 1,6-H shift, which is only happening for anti isomer, and the ring-closure forming R4.

- 10 The late degradation products after the 1,6-H-shift are 8-OOH-menthen-6-one (R7P1) and 2-OH-OOH-menthen-6-one (R9P1). The ring-closure leads to the formation of a dicarbonyl cycloperoxide (R5P1).

The model introduced new RO<sub>2</sub>, which are not been part of the MCM, and a substantial fraction of the total reaction proceeds through these pathways. This underestimates the HO<sub>2</sub> loss by the reaction of RO<sub>2</sub> + OH, especially in the sensitivity run M2. Therefore the RO<sub>2</sub> + HO<sub>2</sub> reactions in the lower half of Table S3 are added.

**Table S2.** Additional and modified reactions applied to the MCM based on the proposed mechanism by Vereecken et al. (2007). For additional OH abstraction chemistry see Table S3. All nitrate species are lumped as one species RNO3.

| reaction                  | reaction rate constant                                                                            |
|---------------------------|---------------------------------------------------------------------------------------------------|
| APINENE + OH→ROOA         | $0.12 \times 1.2 \times 10^{-11} \exp(440\text{K}/\text{T}) \text{ cm}^3\text{s}^{-1}$            |
| APINENE + OH→APINAO2      | $0.22 \times 1.2 \times 10^{-11} \exp(440\text{K}/\text{T}) \text{ cm}^3\text{s}^{-1}$            |
| APINENE + OH→APINBO2      | $0.44 \times 1.2 \times 10^{-11} \exp(440\text{K}/\text{T}) \text{ cm}^3\text{s}^{-1}$            |
| APINENE + OH→synR1        | $0.4 \times 0.22 \times 1.2 \times 10^{-11} \exp(440\text{K}/\text{T}) \text{ cm}^3\text{s}^{-1}$ |
| APINENE + OH→antiR1       | $0.6 \times 0.22 \times 1.2 \times 10^{-11} \exp(440\text{K}/\text{T}) \text{ cm}^3\text{s}^{-1}$ |
| APINAO2 + NO→APINANO3     | $0.03 \times \text{KRO2NO}^a$                                                                     |
| APINAO2 + NO→APINAO + NO2 | $0.97 \times \text{KRO2NO}^a$                                                                     |
| APINAO →PINAL + HO2       | $0.875 \times \text{KDEC}^b$                                                                      |
| APINAO →HCHO + HO2        | $0.125 \times \text{KDEC}^b$                                                                      |
| APINBO2 + NO→APINBNO3     | $0.07 \times \text{KRO2NO}^a$                                                                     |
| APINBO2 + NO→APINBO + NO2 | $0.93 \times \text{KRO2NO}^a$                                                                     |
| antiR1 + NO →R2 + NO2     | $\text{KRO2NO}^a$                                                                                 |
| antiR1 →R4                | $0.6 \text{ s}^{-1}$                                                                              |
| antiR1 →R7                | $11.5 \text{ s}^{-1}$                                                                             |
| synR1 + NO→R2 + NO2       | $\text{KRO2NO}^a$                                                                                 |
| synR1 →R4                 | $2.6 \text{ s}^{-1}$                                                                              |
| R2 →R2P1 + CH3COCH3 + HO2 | $\text{KDEC}^b$                                                                                   |
| R4 + NO→RNO3              | $0.1 \times \text{KRO2NO}^a$                                                                      |
| R4 + NO→R5 + NO2          | $0.9 \times \text{KRO2NO}^a$                                                                      |
| R5 →R5P1 + HO2            | $\text{KDEC}^b$                                                                                   |
| R7 →R8                    | $0.5 \times \text{KDEC}^b$                                                                        |
| R7 →R7P1 + HO2            | $0.5 \times \text{KDEC}^b$                                                                        |
| R8 + NO→RNO3              | $0.29 \times \text{KRO2NO}^a$                                                                     |
| R8 + NO→R9 + NO2          | $0.71 \times \text{KRO2NO}^a$                                                                     |
| R9 →R9P1 + HO2            | $\text{KDEC}^b$                                                                                   |

<sup>a</sup> value from MCM:  $\text{KRO2NO} = 2.7 \times 10^{-12} \exp(360\text{K}/\text{T}) \text{ cm}^3\text{s}^{-1}$  (MCM, 2019)

<sup>b</sup> value from MCM:  $\text{KDEC} = 1.0 \times 10^6$  (MCM, 2019)

**Table S3.** Additional OH abstraction reactions and subsequent product reactions applied to the MCM based on the proposed mechanism by Vereecken et al. (2007). All nitrate species are lumped as one species RNO3. All reaction products of RO<sub>2</sub> + HO<sub>2</sub> are lumped as one species RRO2.

| reaction                    | reaction rate constant        |
|-----------------------------|-------------------------------|
| ROOA + NO → RNO3            | $0.11 \times \text{KRO2NO}^a$ |
| ROOA + NO → ROA + NO2       | $0.89 \times \text{KRO2NO}^a$ |
| ROA → ROOB                  | $0.6 \times \text{KDEC}^b$    |
| ROA → ROOC                  | $0.4 \times \text{KDEC}^b$    |
| ROOB + NO → RNO3            | $0.11 \times \text{KRO2NO}^a$ |
| ROOB + NO → ROB + NO2       | $0.89 \times \text{KRO2NO}^a$ |
| ROB → CH3COCH3 + HCHO + HO2 | $\text{KDEC}^b$               |
| ROOC + NO → RNO3            | $0.11 \times \text{KRO2NO}^a$ |
| ROOC + NO → ROC + NO2       | $0.89 \times \text{KRO2NO}^a$ |
| ROC → HCHO + HO2            | $\text{KDEC}^b$               |
| synR1 + HO2 → APINCOOH      | $\text{KRO2HO2}^c$            |
| antiR1 + HO2 → APINCOOH     | $\text{KRO2HO2}^c$            |
| R4 + HO2 → RRO2             | $\text{KRO2HO2}^c$            |
| R8 + HO2 → RRO2             | $\text{KRO2HO2}^c$            |
| R10 + HO2 → RRO2            | $\text{KRO2HO2}^c$            |
| R12 + HO2 → RRO2            | $\text{KRO2HO2}^c$            |
| ROOA + HO2 → RRO2           | $\text{KRO2HO2}^c$            |
| ROOB + HO2 → RRO2           | $\text{KRO2HO2}^c$            |
| ROOC + HO2 → RRO2           | $\text{KRO2HO2}^c$            |

<sup>a</sup> value from MCM:  $\text{KRO2NO} = 2.7 \times 10^{-12} \exp(360\text{K}/\text{T}) \text{ cm}^3 \text{ s}^{-1}$  (MCM, 2019)

<sup>b</sup> value from MCM:  $\text{KDEC} = 1.0 \times 10^6$  (MCM, 2019)

<sup>c</sup> value from MCM:  $\text{KRO2HO2} = 2.9110^{-13} \exp(1300\text{K}/\text{T}) \text{ cm}^3 \text{ s}^{-1}$  (MCM, 2019)

## References

- Atkinson, R., Baulch, D. L., Cox, R. A., Crowley, J. N., Hampson, R. F., Hynes, R. G., Jenkin, M. E., Rossi, M. J., Troe, J., and Subcommittee, I.: Evaluated kinetic and photochemical data for atmospheric chemistry: Volume II - gas phase reactions of organic species, *Atmos. Chem. Phys.*, 6, 3625–4055, <https://doi.org/10.5194/acp-6-3625-2006>, 2006.
- 5 Galloway, M. M., Huisman, A. J., Yee, L. D., Chan, A. W. H., Loza, C. L., Seinfeld, J. H., and Keutsch, F. N.: Yields of oxidized volatile organic compounds during the OH radical initiated oxidation of isoprene, methyl vinyl ketone, and methacrolein under high-NO<sub>x</sub> conditions, *Atmos. Chem. Phys.*, 11, 10 779–10 790, <https://doi.org/10.5194/acp-11-10779-2011>, 2011.
- Kaminski, M., Fuchs, H., Acir, I. H., Bohn, B., Brauers, T., Dorn, H. P., Häseler, R., Hofzumahaus, A., Li, X., Lutz, A., Nehr, S., Rohrer, F., Tillmann, R., Vereecken, L., Wegener, R., and Wahner, A.: Investigation of the  $\beta$ -pinene photooxidation by OH in the atmosphere  
10 simulation chamber SAPHIR, *Atmos. Chem. Phys.*, 17, 6631–6650, <https://doi.org/10.5194/acp-17-6631-2017>, 2017.
- MCM: The Master Chemical Mechanism, v3.3.1, <http://mcm.leeds.ac.uk/MCM>, last access: 28 April, 2019.
- Vereecken, L., Müller, J. F., and Peeters, J.: Low-volatility poly-oxygenates in the OH-initiated atmospheric oxidation of  $\alpha$ -pinene: impact of non-traditional peroxy radical chemistry, *Phys. Chem. Chem. Phys.*, 9, 5241–5248, <https://doi.org/10.1039/B708023A>, 2007.
